# Supplementary material for: Screening for Anemia and Iron Deficiency in the Adult Portuguese Population
Source: PubMed Central journal article supplement (PMC7411453; doi:10.1155/2020/1048283), 2020-07-29
Supplement: 1048283.f1.pdf [file 1048283.f1.pdf]

1 **Supplementary Materials**

2 Supplementary Figure S1: Sample form of the survey on anemia and iron deficiency applied  
3 during the screening conducted in mainland Portugal between 2013-2017 (English translation  
4 of the original Portuguese form).

**ANEMIA AND IRON DEFICIENCY – SURVEY**

**I. SOCIODEMOGRAPHIC CHARACTERIZATION**

(1) Age: \_\_\_\_\_ (2) Gender: **Male (M)** ♂  
(3) Nationality: \_\_\_\_\_ **Female (F)** / Pregnant: No / **YES** ♀

**II. SYMPTOMS**

(1) **Fatigue** in daily activities: **(SE)** Slight efforts (hygiene, walking on a flat floor)  
No/  
**YES** when **(AE)** Average efforts (walking on a sloping floor)  
**(GE)** Great efforts (climb >3 flights of stairs)

(2) Bleed easily **(BE)**  
Headaches **(HA)** No / **YES**  
Dizziness **(DZ)**

(3) **Visible blood loss:** No / **Feces (Fc)**  
**YES** in **Urine (Ur)**  
Nose / Mouth **(Ns/Mt)**  
Vagina (unrelated to menstrual bleeding) **(Vg)**  
Recent surgery (<3 months) **(Srg)**

**III. PERSONAL BACKGROUND**

(1) History of **ANEMIA:** No / **YES**, current therapy \_\_\_\_\_  
(2) **Chronic diseases:** No / **YES:**  
Renal insufficiency – WITHOUT dialysis **(R)** | Heart failure **(HF)**  
Renal insufficiency – dialysis **(RD)** | Coronary disease (angina, infarction) **(Cor)**  
Gastritis **(G)** | Valvular heart disease (prosthesis) **(VH)**  
Crohn's disease **(Crohn)** | Celiac disease **(Cel)**  
Ulcerative colitis **(UC)**  
Intestinal polyps **(IP)** | Other (s) \_\_\_\_\_

5  
6

Supplementary Table S2: Prevalence and prevalence ratio of anemia and iron deficiency stratified by type of location of the participant.

| Type of institution                | n (%)       | Anemia (N = 11030)        |                     | ID (N = 11030)            |                  |
|------------------------------------|-------------|---------------------------|---------------------|---------------------------|------------------|
|                                    |             | Prevalence, %<br>(95% CI) | PR (95% CI)         | Prevalence, %<br>(95% CI) | PR (95% CI)      |
| Health institutions                | 4653 (42.2) | 56.7 (55.2-58.1)          | 1.59 (1.50-1.68)*** | 59.6 (58.2-61.0)          | 1.04 (0.99-1.10) |
| Public                             | 2173 (19.7) |                           |                     |                           |                  |
| Private                            | 2480 (22.5) |                           |                     |                           |                  |
| Other public locations             | 6377 (57.8) | 35.6 (34.5-36.8)          | 1 [Reference]       | 57.0 (55.8-58.3)          | 1 [Reference]    |
| Medical and health<br>congresses   | 1544 (14.0) |                           |                     |                           |                  |
| Companies                          | 1106 (10.0) |                           |                     |                           |                  |
| Pharmacies and<br>Shopping Centers | 3727 (33.8) |                           |                     |                           |                  |

Abbreviations: CI; confidence interval; ID, iron deficiency; N, total number of participants; PR, prevalence ratio.

\*\*\*P-value <0.001; Wald chi-square test.
